# Supplementary material for: Streptococcus pyogenes antigen I/II-family polypeptide AspA shows differential ligand-binding properties and mediates biofilm formation
Source: PubMed Central journal article supplement (PMC3178794; doi:10.1111/j.1365-2958.2011.07749.x), 2011-07-15
Supplement: mmi0081-1034-SD1.pdf [file mmi0081-1034-SD1.pdf]

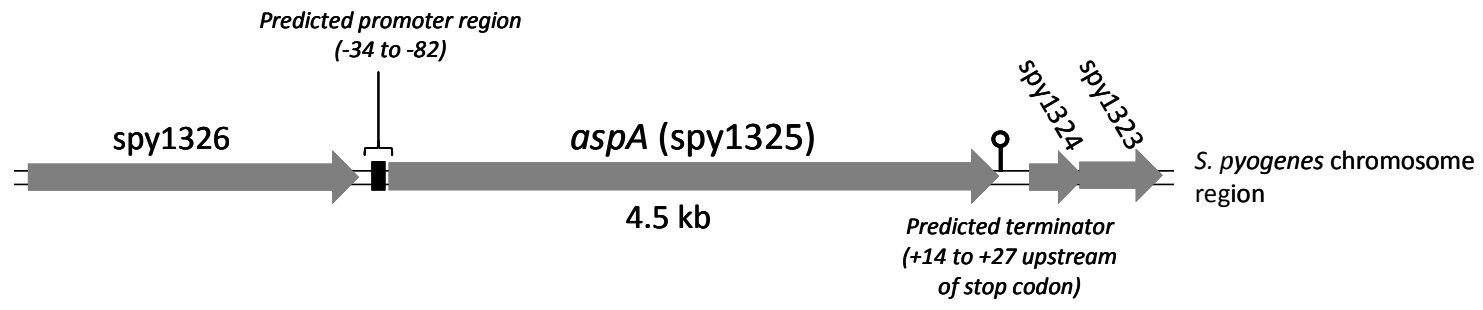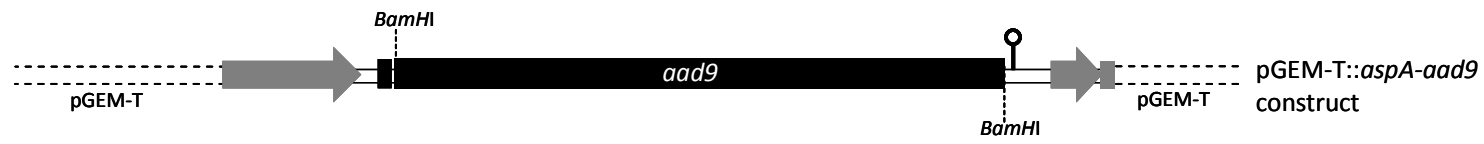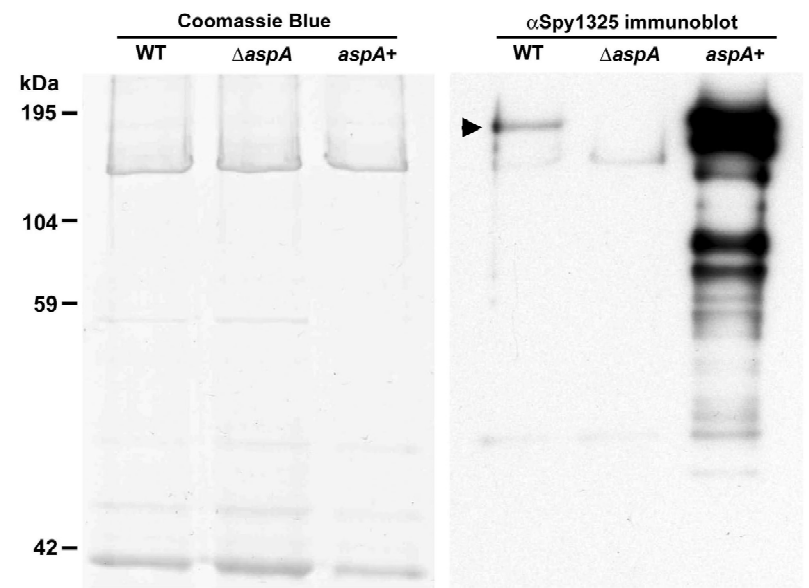

MGAS6180

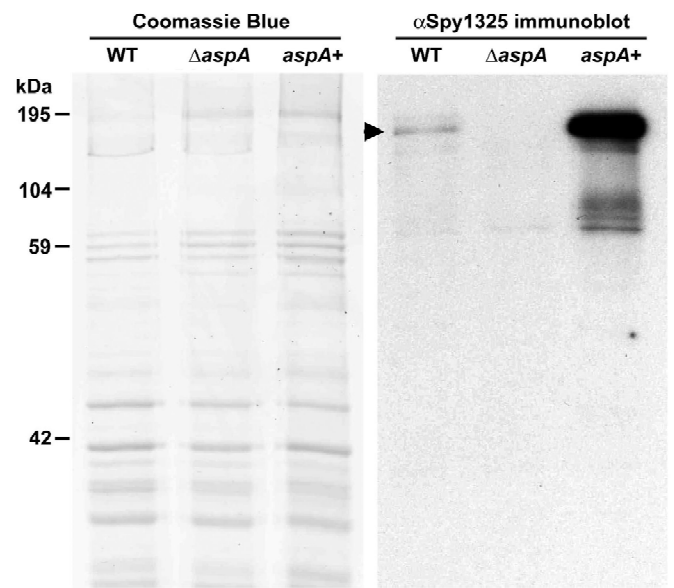

H360

**Supplemental Fig. S2.** Production of isogenic *aspA* knockout mutants in strains MGAS6180 and H360, and AspA expression profiles of wild-type,  $\Delta$ *aspA* and complemented strains.

(A) Regions flanking the *aspA* gene, which were identical in the two strains, were PCR-amplified and the *aad9* cassette conferring spectinomycin resistance was ligated in between the flanking regions. The construct was transformed into GAS, thus deleting the *aspA* gene by allelic replacement. The knockout mutants were complemented *in trans* with pKS80 *aspA*<sup>+</sup> plasmid. The *aspA* gene (4.5 kb) lies downstream of M28\_ *spy1236* and upstream of two small operonic genes, M28\_ *spy1234* and M28\_ *spy1323*. The *aspA* gene is mono-cistronic with its own promoter region and a rho-independent terminator sequence. The putative *aspA* promoter region is located between 34-82 bp upstream of the ATG start codon, and putative terminator lies between 14-27 bp downstream of the stop codon. The allelic replacement resulted in deletion of the complete coding sequence, leaving in place the native promoter and terminator, as confirmed by sequencing.

(B) Western immunoblot analysis of cell wall-extracted proteins from *S. pyogenes* MGAS6180 or H360 wild-type strains,  $\Delta$ *aspA* mutants, and  $\Delta$ *aspA* (pKS80 *aspA*<sup>+</sup>) complemented strains. Blots were reacted with rVP-AspA antiserum (1:500 dilution) and antibody binding was detected with HRP-linked secondary antibody followed by ECL. Corresponding Coomassie Blue stained gels are shown and an equivalent amount of protein (5  $\mu$ g) was applied to each lane.

**Table S1.** Bacterial strains used in this study

| Strain             |           | Characteristics                                                          | Reference/Source                        |
|--------------------|-----------|--------------------------------------------------------------------------|-----------------------------------------|
| <i>E. coli</i>     | JM109     | <i>recA</i>                                                              | Novagen                                 |
|                    | BL21/λDE3 | Lamba DE3 lysogen                                                        | Novagen                                 |
|                    | XL1       | <i>lacI<sup>f</sup> ΔlacZ</i>                                            | Stratagene                              |
| <i>S. pyogenes</i> | H360      | Serotype M28, STSS*                                                      | Proft <i>et al.</i> (2003) <sup>†</sup> |
|                    | UB2042    | H360 $\Delta$ <i>aspA::aad9</i>                                          | This study                              |
|                    | UB2050    | H360 $\Delta$ <i>aspA::aad9</i><br>(pKS80 <i>aspA</i> <sup>+</sup> )     | This study                              |
|                    | MGAS6180  | Serotype M28, invasive<br>disease                                        | Green <i>et al.</i> (2006) <sup>‡</sup> |
|                    | UB2086    | MGAS6180 $\Delta$ <i>aspA::aad9</i>                                      | This study                              |
|                    | UB2117    | MGAS6180 $\Delta$ <i>aspA::aad9</i><br>(pKS80 <i>aspA</i> <sup>+</sup> ) | This study                              |
|                    |           |                                                                          |                                         |
| <i>L. lactis</i>   | MG1363    | Wild-type                                                                | Laboratory stock                        |
|                    | UB2265    | (pKS80 <i>aspA</i> <sup>+</sup> )                                        | This study                              |
|                    | UB2136    | (pKS80 <i>sspB</i> <sup>+</sup> )                                        | This study                              |

\* Streptococcal toxic shock syndrome

<sup>†</sup> Proft, T., Sriskandan, S., Yang, L., and Fraser, J. D. (2003) Superantigens and streptococcal toxic shock syndrome. *Emerg Infect Dis* **9**: 1211-1218.

<sup>‡</sup> Green, N.M., Zhang, S., Porcella, S.F., Nagiec, M.J., Barbian, K.D., Beres, S.B., *et al.* (2005) Genome sequence of a serotype M28 strain of Group A *Streptococcus*: potential new insights into puerperal sepsis and bacterial disease specificity. *J Infect Dis* **192**: 760-770.

**Table S2.** Primers used in this study

| Primer name | Primer sequence                          |
|-------------|------------------------------------------|
| AspA-F1     | <b>GACGACGACAAGAT</b> GTTGGGTACAACAAGT   |
| AspA-R3     | <b>GAGGAGAAGCCCGG</b> TATTTTTCTTGCTCAAC  |
| AspA-mF     | <b>GACGACGACAAGAT</b> GACTGTTACAAC       |
| AspA-mR     | <b>GAGGAGAAGCCCGG</b> TACTTAGCCACGT      |
| AspA-F3     | <b>GACGACGACAAGAT</b> GGATCAGGTTAATATC   |
| AspA-R1     | <b>GAGGAGAAGCCCGG</b> TACTCTCCTGTGGATGG  |
| BamHI-F     | AAAACCAAAGACCCTGACAAACC                  |
| KSspBrev2   | GCACTCGCCTGCAGGGTAATCAGTCCAAGCTATTTGATT  |
| BamSspF2    | GCACGCGGATCCAAATGGAAAAAAAAAGATTATCTCA    |
| BamHIRev    | GGTTTGTGAGGGTCTTTTGGTTTT                 |
| Agl/II-pKSF | AAAGGAGGATCCAAATGAAACAAATGGAAACTAAGGGTTA |
| Agl/II-pKSR | TCGACTGCAGTCCATTAATAACTTACTGTTGACG       |
| Aad9fwd     | ATGCGGATCCAGTATAATAACTATAACTAATAACG      |
| Aad9rev     | CGTAGGATCCCTTTACCAATTAGAATGAATATTTCCCAA  |
| US1325-F    | GCCAGCAGTCAGGGGAGTTGG                    |
| US1325-R    | CTGAGGATCCCATGCGATCACGAATGGCGGCATTC      |
| DS1325-F    | GATGGGATCCTCAGAACCATTGTGGACGACAAGGG      |
| DS1325-R    | ATACTCCTTGCTCTCCTGTGG                    |

Primer sequences in bold correspond to those required for cloning into pET46-Ek-LIC (Novagen). Underlined primer sequences correspond to restriction endonuclease sites.
